# Supplementary material for: Next generation DNA sequencing of atypical choroid plexus papilloma of brain: Identification of novel mutations in a female patient by Ion Proton
Source: PubMed Central journal article supplement — Oncol Lett. 2019 Sep 19;18(5):5063–76. doi: 10.3892/ol.2019.10882 (PMC6781611; doi:10.3892/ol.2019.10882), 2019-09-19
Supplement: Supplementary_Data.pdf [file Supplementary_Data.pdf]

Figure S1. Immunohistochemistry demonstrated negative staining for (A) P53, (B) EMA, (C) GFAP, and (D) Vimentin in atypical choroid plexus papilloma tumor (all magnifications, x4).

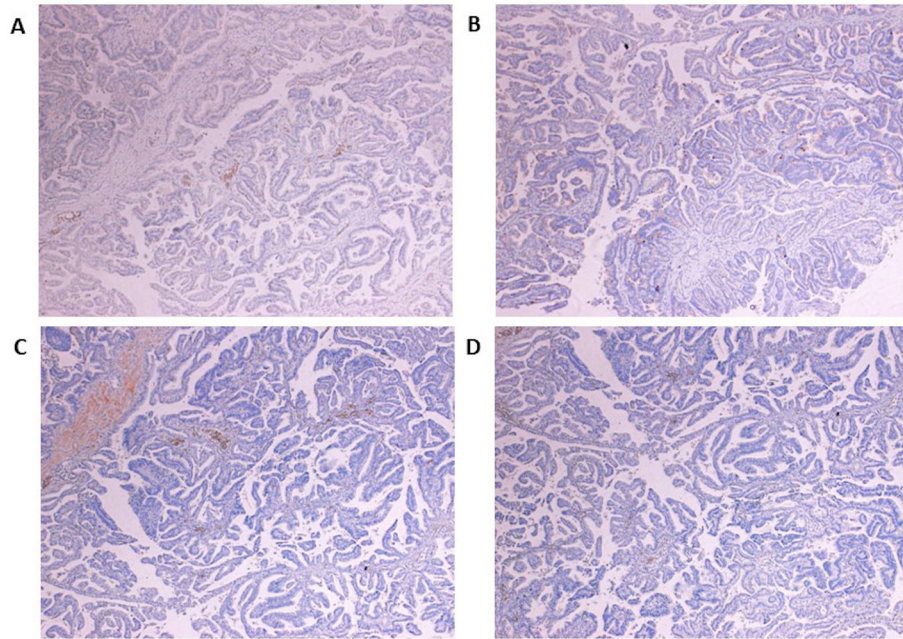

Figure S2. Immunohistochemistry demonstrated negative staining for (A) epidermal growth factor receptor, (B) thyroid transcription factor 1 and (C) CK-7, in atypical choroid plexus papilloma tumor (all x4 magnification).

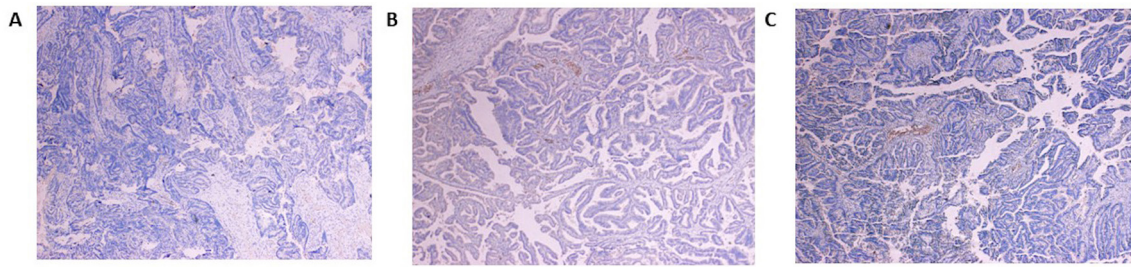

Figure S3. Positive control staining for antibodies. Known positive control tissues were stained with antibodies for (A) P53 (x40 magnification), (B) EMA (x20 magnification), (C) GFAP (x40 magnification), (D) vimentin (x20 magnification), (E) EGFR (x20 magnification), (F) TTF1 (x20 magnification) and (G) CK7 (x20 magnification).

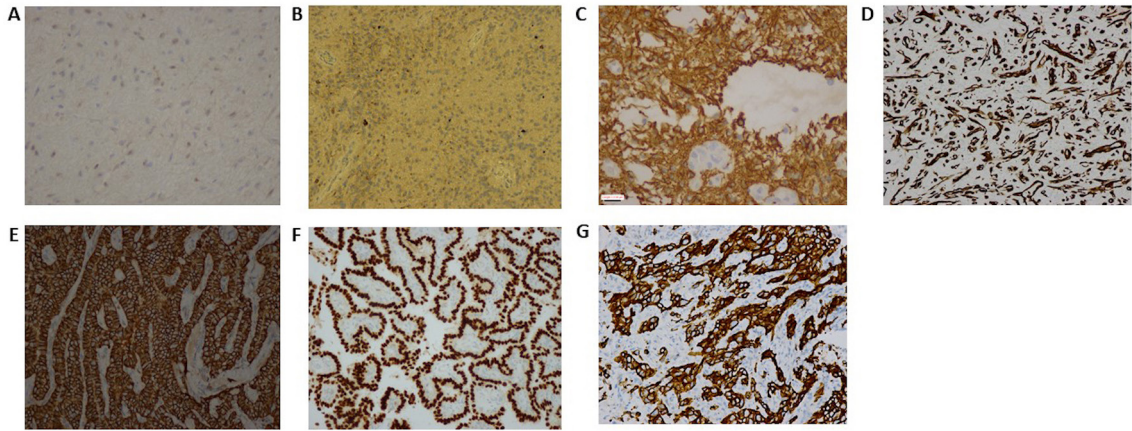

Table SI. Sequencing coverage analysis report from Torrent Suite software.

| Target base coverage             |           | Amplicon read coverage            |        |
|----------------------------------|-----------|-----------------------------------|--------|
| Variable                         | Value     | Variable                          | Value  |
| Bases in target regions          | 1,688,650 | Number of amplicons               | 15,992 |
| Percent base reads on target     | 83.18%    | Percent assigned amplicon reads   | 82.30% |
| Average base coverage depth      | 459.4     | Average reads per amplicon        | 466.5  |
| Uniformity of base coverage      | 85.58%    | Uniformity of amplicon coverage   | 85.61% |
| Target base coverage at 1x       | 99.66%    | Amplicons with at least 1 read    | 99.74% |
| Target base coverage at 20x      | 96.55%    | Amplicons with at least 20 reads  | 99.59% |
| Target base coverage at 100x     | 84.35%    | Amplicons with at least 100 reads | 84.62% |
| Target base coverage at 500x     | 32.99%    | Amplicons with at least 500 reads | 34.39% |
| Target bases with no strand bias | 95.63%    | Amplicons with no strand bias     | 96.20% |
| Percent end-to-end reads         | 92.13%    | Amplicons reading end-to-end      | 93.10% |

Table SII. Quality statistics of Novel Exonic Variants found in an atypical choroid plexus papilloma patient.

| Genes          | Coding     | Allele coverage | Allele ratio       | PolyPhen | P-value | Coverage (x) |
|----------------|------------|-----------------|--------------------|----------|---------|--------------|
| <i>NOTCH1</i>  | c.4214C>A  | G=44, T=8       | G=0.8462, T=0.1538 | 0.429    | 0.00002 | 52           |
| <i>ATM</i>     | c.5808A>T  | A=1930, T=69    | A=0.9655, T=0.0345 | 0.097    | 0.00407 | 1999         |
| <i>STK36</i>   | c.2439A>T  | A=18, T=6       | A=0.75, T=0.25     | 0.076    | 0.00021 | 24           |
| <i>MAGI1</i>   | c.2026A>G  | T=439, C=109    | T=0.8011, C=0.1989 | 0.06     | 0.00001 | 548          |
| <i>DST</i>     | c.15347A>T | T=144, A=58     | T=0.7129, A=0.2871 | 0.999    | 0.00001 | 202          |
| <i>RECQL4</i>  | c.1412A>C  | T=76, G=10      | T=0.8837, G=0.1163 | 0.917    | 0.00003 | 86           |
| <i>NUMA1</i>   | c.4159C>G  | G=97, C=10      | G=0.9065, C=0.0935 | 0.979    | 0.00014 | 107          |
| <i>THBS1</i>   | c.2646G>T  | G=10, T=50      | G=0.1667, T=0.8333 | 1.0      | 0.00001 | 62           |
| <i>MYH11</i>   | c.1968G>A  | C=40, T=5       | C=0.8889, T=0.1111 | 0.983    | 0.00283 | 45           |
| <i>MALT1</i>   | c.1015T>G  | T=231, G=12     | T=0.9506, G=0.0494 | 0.007    | 0.00946 | 243          |
| <i>CDH20</i>   | c.2354G>A  | G=243, A=30     | G=0.8901, A=0.1099 | 0.006    | 0.00001 | 273          |
| <i>SMARCA4</i> | c.2729C>T  | C=266, T=2      | C=0.9925, T=0.0075 | 0.99     | 0.00543 | 268          |

Table SIII. Quality statistics of Reported Exonic Variants found in an atypical choroid plexus papilloma patient.

| Genes        | Coding    | Allele coverage | Allele ratio       | PolyPhen | P-value | Coverage (x) |
|--------------|-----------|-----------------|--------------------|----------|---------|--------------|
| <i>ATM</i>   | c.5948A>G | A=1, G=127      | A=0.0078, G=0.9922 | 0.00     | 0.00001 | 128          |
| <i>GATA2</i> | c.967C>T  | G=5, A=60       | G=0.0769, A=0.9231 | 0.933    | 0.00001 | 65           |
| <i>FGFR3</i> | c.2044G>A | G=21, A=304     | G=0.0646, A=0.9354 | 0.987    | 0.00001 | 325          |
| <i>KDM5C</i> | c.3791C>T | G=173, A=14     | G=0.9251, A=0.0749 | 0.958    | 0.00012 | 187          |
| <i>ALK</i>   | c.4381A>G | T=0, C=581      | T=0.0, C=1.0       | 0.0      | 0.00001 | 581          |
| <i>APC</i>   | c.7858T>A | T=215, A=53     | T=0.8022, A=0.1978 | 0.0      | 0.00001 | 268          |
| <i>EGFR</i>  | c.2506C>T | C=354, T=3      | C=0.9916, T=0.0084 | 0.95     | 0.00172 | 357          |
| <i>EGFR</i>  | c.2551G>A | G=377, A=3      | G=0.9921, A=0.0079 | 0.99     | 0.00094 | 380          |
| <i>EGFR</i>  | c.2569G>A | G=390, A=5      | G=0.9873, A=0.0127 | 0.99     | 0.00632 | 395          |
| <i>EGFR</i>  | c.3263C>T | C=163, T=128    | C=0.5601, T=0.4399 | 0.009    | 0.00001 | 291          |

Table SIV. Quality statistics of Novel INDELS Variants found in an atypical choroid plexus papilloma patient.

| Genes                           | Coding                              | Allele coverage                                        | Allele ratio                                                   | P-value | Coverage (x) |
|---------------------------------|-------------------------------------|--------------------------------------------------------|----------------------------------------------------------------|---------|--------------|
| <i>NOTCH1</i>                   | c.4732_4734delGTG                   | GCACCACCACCA=1920,<br>GCACCACCA=18,<br>GCACCACCACCAC=0 | GCACCACCACCA=0.9907,<br>GCACCACCA=0.0093,<br>GCACCACCACCAC=0.0 | 0.00001 | 1938         |
| <i>PARP1</i>                    | c.1056_1057insG,<br>c.1056_1057insA | G=0, GC=381, GT=332                                    | G=0.0, GC=0.5344,<br>GT=0.4656                                 | 0.00001 | 713          |
| <i>MIR3163,</i><br><i>SYNE1</i> | c.21904_21905insG                   | A=0, AC=225                                            | A=0.0, AC=1.0                                                  | 0.00001 | 225          |
| <i>MET</i>                      | c.525T>A                            | T=889, A=80                                            | T=0.9174, A=0.0826                                             | 0.00001 | 969          |
| <i>RNF213</i>                   | c.6967C>T                           | C=423, T=62                                            | C=0.8722, T=0.1278                                             | 0.00001 | 485          |

Table SV. Quality statistics of Novel Intronic Variants found in an atypical choroid plexus papilloma patient.

| Genes                               | Coding          | Allele coverage                  | Allele ratio                                | P-value | Coverage (x) |
|-------------------------------------|-----------------|----------------------------------|---------------------------------------------|---------|--------------|
| <i>ERBB4</i>                        | c.1946+18T>G    | A=137, C=120                     | A=0.5331, C=0.4669                          | 0.00001 | 257          |
| <i>RET</i>                          | c.2392+32C>T    | C=46, T=3                        | C=0.9388, T=0.0612                          | 0.04513 | 49           |
| <i>FGFR1</i>                        | c.2141+20T>G    | A=133, C=9                       | A=0.9366, C=0.0634                          | 0.0062  | 142          |
| <i>FGFR3</i>                        | c.2169-32G>A    | G=16, A=7                        | G=0.6957, A=0.3043                          | 0.00003 | 23           |
| <i>PMS1</i>                         | c.132+1G>C      | G=1647, C=133                    | G=0.9253, C=0.0747                          | 0.00001 | 1780         |
| <i>PMS1</i>                         | c.700-41A>C     | A=1219, C=101                    | A=0.9235, C=0.0765                          | 0.00001 | 1320         |
| <i>PAX3</i>                         | c.586+449GAG>G  | CTC=372, C=27,<br>CTA=0          | CTC=0.9323, C=0.0677,<br>CTA=0.0            | 0.00001 | 399          |
| <i>SDHA</i>                         | c.896-88T>C     | T=156, C=26                      | T=0.8571, C=0.1429                          | 0.00001 | 182          |
| <i>LIFR</i>                         | c.2065+47A>T    | T=493, A=29                      | T=0.9444, A=0.0556                          | 0.00319 | 522          |
| <i>PDGFRB</i>                       | c.2698+45T>A    | A=609, T=247                     | A=0.7114, T=0.2886                          | 0.00001 | 856          |
| <i>MAP3K7</i>                       | c.1524+39TTCT>T | AGAA=100, AA=0,<br>A=32, AGAAA=0 | AGAA=0.7576, AA=0.0,<br>A=0.2424, AGAAA=0.0 | 0.00001 | 132          |
| <i>PRKDC</i>                        | c.1448-52TG>GT  | CA=894, AC=45                    | CA=0.9521, AC=0.0479                        | 0.00002 | 939          |
| <i>BRD3,</i><br><i>LOC100130548</i> | c.-7C>T         | G=17, A=4                        | G=0.8095, A=0.1905                          | 0.0084  | 21           |
| <i>WT1</i>                          | c.1644A>G       | T=267, C=65                      | T=0.8042, C=0.1958                          | 0.00001 | 332          |
| <i>AKT2</i>                         | c.709-53G>T     | C=135, A=12                      | C=0.9184, A=0.0816                          | 0.00014 | 147          |
| <i>SMARCB1</i>                      | c.986+30T>C     | T=26, C=10                       | T=0.7222, C=0.2778                          | 0.00001 | 36           |



Table SVI. Quality statistics of Novel Synonymous Variants found in atypical choroid plexus papilloma.

| Genes         | Coding    | Allele coverage | Allele ratio       | P-value | Coverage (x) |
|---------------|-----------|-----------------|--------------------|---------|--------------|
| <i>PIK3CA</i> | c.3144T>C | T=1898, C=99    | T=0.9504, C=0.0496 | 0.00001 | 1997         |
| <i>FGFR3</i>  | c.1953G>A | G=0, A=1997     | G=0.0, A=1.0       | 0.00001 | 1997         |
| <i>PDGFRA</i> | c.1701A>G | A=0, G=1996     | A=0.0, G=1.0       | 0.00001 | 1996         |
| <i>RET</i>    | c.2307G>T | G=0, T=1994     | G=0.0, T=1.0       | 0.00001 | 1994         |
| <i>NOTCH2</i> | c.3963G>T | C=1232, A=48    | C=0.9625, A=0.0375 | 0.00306 | 1280         |
| <i>IGF2R</i>  | c.6948G>A | G=22, A=122     | G=0.1528, A=0.8472 | 0.00001 | 144          |
| <i>ADGRA2</i> | c.2817C>G | C=89, G=136     | C=0.3956, G=0.6044 | 0.00001 | 225          |
| <i>PRKDC</i>  | c.2319A>G | T=932, C=852    | T=0.5224, C=0.4776 | 0.00001 | 1784         |
| <i>PAX5</i>   | c.42G>A   | C=649, T=650    | C=0.4996, T=0.5004 | 0.00001 | 1299         |
| <i>TET1</i>   | c.3900C>A | C=165, A=36     | C=0.8209, A=0.1791 | 0.00001 | 201          |
| <i>IDH2</i>   | c.519C>T  | G=249, A=16     | G=0.9396, A=0.0604 | 0.00049 | 265          |
